# Supplementary material
Source: PubMed Central journal article supplement (PMC2572960)
Supplement: 0804106105_0804106105SI.pdf [file 0804106105_0804106105SI.pdf]

# Supporting Information

Décaillot *et al.* 10.1073/pnas.0804106105

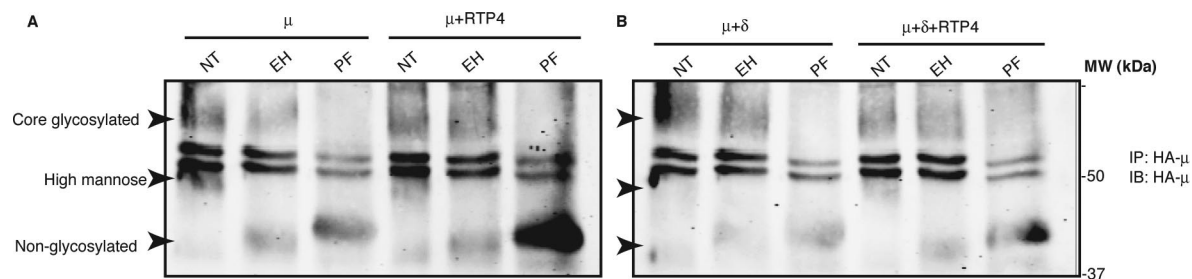

**Fig. S1.** (A) Western blot analysis shows that HA-tagged  $\mu$  receptors are expressed in Neuro2A cells as a mature form (core glycosylated) and an immature form (high mannose). The latest can be digested by treatment with endoglycosidase H (EH) whereas both bands are digested by treatment by PNGase F (PF) into a nonglycosylated form. (B)  $\mu$  receptors are present as a mature receptor that is resistant to EndoH digestion in all conditions, consistent with our observation that  $\mu$  receptors are found at the plasma membrane and/or in the Golgi apparatus. Note that in the absence of glycosidase treatment, the high mannose (nonmature) form of the receptor is not detected in  $\mu$ - $\delta$  cells, but is partially recovered in  $\mu$ - $\delta$ +RTP4 cells. NT, not treated.



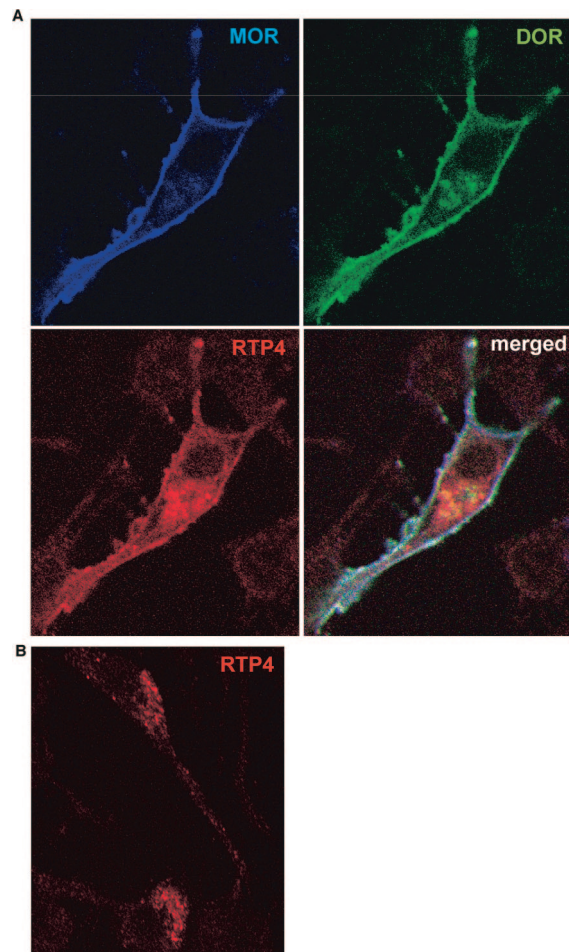

**Fig. S3.** Colocalization of  $\mu$ ,  $\delta$  and RTP4 in Neuro2A cells. (A) Immunofluorescence images of Neuro2A cells co-expressing HA-tagged  $\mu$  (Upper Left), myc-tagged  $\delta$  (Upper Right) and FLAG-tagged RTP4 (Middle Left). Immunostaining with anti-HA, anti-myc and anti-FLAG antibodies were carried out as described previously. (B) Immunofluorescence images of Neuro2A cells expressing only RTP4 where in the absence of receptors  $\delta$ , RTP4 exhibits a predominantly cytoplasmic localization.

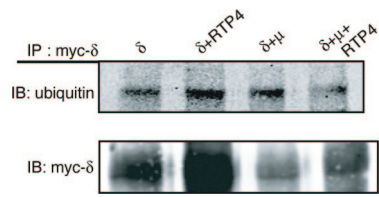

**Fig. S4.** Western blot analysis shows the level of ubiquitination of  $\delta$  receptors when co-expressed with  $\mu$  receptors; co-expression of RTP4 leads to a decrease in the extent of  $\delta$  receptor ubiquitination.

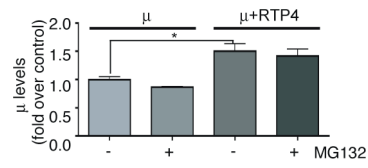

**Fig. S5.** Co-expression with RTP4 significantly increases  $\mu$  receptors levels as determined by quantification of HA-tagged  $\mu$  receptors coexpressed with RTP4 treated without or with 50  $\mu$ M MG132 at 37°C for 3 h before harvesting.



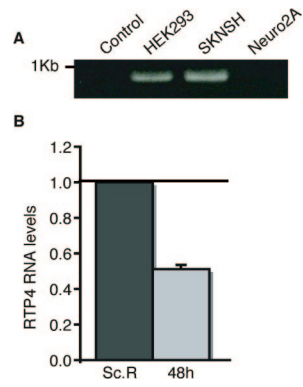

**Fig. S7.** (A) Amplification of human RTP4 in three different cell lines. The two human cell lines (HEK293 and SKNSH) show the presence of hRTP4; mouse Neuro2A cells do not. (B) Quantitative RT-PCR showing a decrease in RTP4 transcript 48 h after transfection with siRNA compared with scrambled siRNA (ScR). Data were normalized to the value obtained with scrambled RNA. dData are given as mean  $\pm$  SEM ( $n = 3$ ).
